# Supplementary material for: Ratiometric fluorescent aptasensor for convenient detection of ochratoxin A in beer and orange juice
Source: Royal Society of Chemistry journal article supplement (doi:10.1039/d3an01360j), 2023-01-01
Supplement: d3an01360j1.pdf [file d3an01360j1.pdf]

## Electronic Supplementary Material

### **Ratiometric fluorescent aptasensor for convenient detection of ochratoxin A in beer and orange juice**

Jie Yu, Wenhan Zhang, Shuheng Ai, Chao Wang\* and Pengfei Shi\*

College of Chemistry and Chemical Engineering, Linyi University, Linyi 276000,  
China.

\*Corresponding authors, e-mails: [shipengfei913@163.com](mailto:shipengfei913@163.com); [wangchao@lyu.edu.cn](mailto:wangchao@lyu.edu.cn)

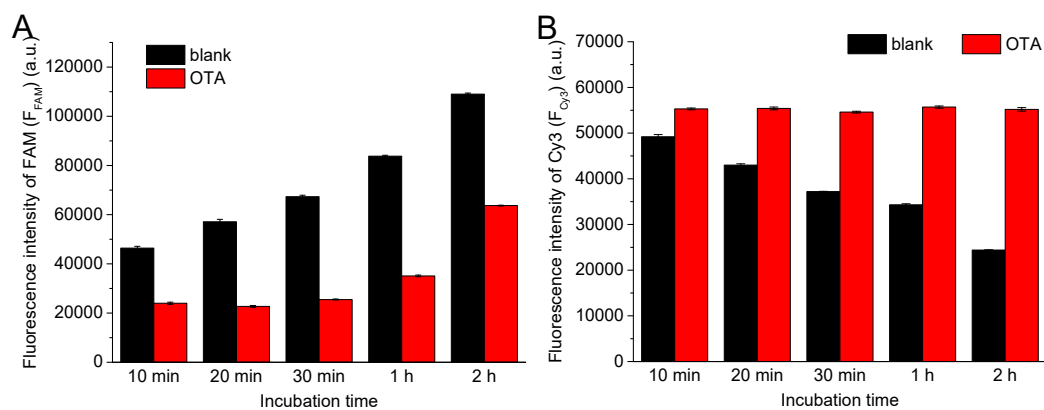

**Fig. S1.** Effects of incubation time on (A)  $F_{FAM}$  and (B)  $F_{Cy3}$ . Assay buffer containing 20 mmol/L Tris-HCl (pH 7.4), 5 mmol/L  $CaCl_2$ , 80 mmol/L NaCl and 0.1% (V/V) tween20 was used. OTA concentration was 500 nmol/L. For measurement of fluorescence intensity of FAM ( $F_{FAM}$ ), excitation/emission was 485 nm/518 nm. For measurement of fluorescence intensity of Cy3 ( $F_{Cy3}$ ), excitation/emission was 530nm/563 nm.

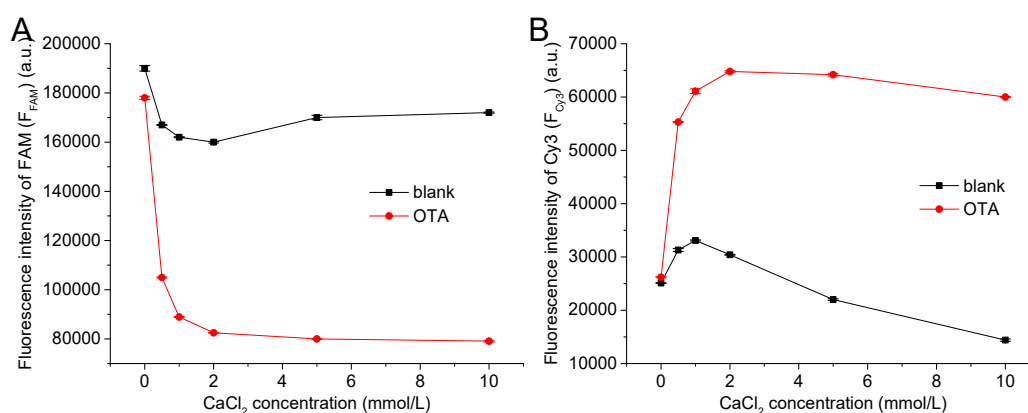

**Fig. S2.** Effects of concentration of  $CaCl_2$  in assay buffer on (A)  $F_{FAM}$  and (B)  $F_{Cy3}$ . Assay buffer containing 20 mmol/L Tris-HCl (pH 7.4), 80 mmol/L NaCl, 0.1% (V/V) tween20 and different concentrations of  $CaCl_2$  was used. OTA concentration was 500 nmol/L. For measurement of fluorescence intensity of FAM ( $F_{FAM}$ ), excitation/emission was 485 nm/518 nm. For measurement of fluorescence intensity of Cy3 ( $F_{Cy3}$ ), excitation/emission was 530 nm/563 nm.

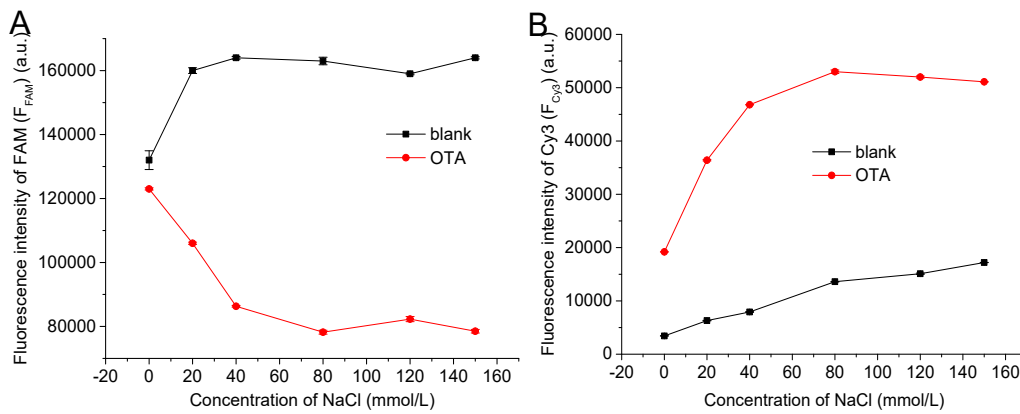

**Fig. S3.** Effects of NaCl concentration in assay buffer on (A)  $F_{FAM}$  and (B)  $F_{Cy3}$ . Assay buffer containing 20 mmol/L Tris-HCl (pH 7.4), 5 mmol/L  $CaCl_2$ , 0.1% (V/V) tween20 and different concentrations of NaCl was used. OTA concentration was 500 nmol/L. For measurement of fluorescence intensity of FAM ( $F_{FAM}$ ), excitation/emission was 485 nm/518 nm. For measurement of fluorescence intensity of Cy3 ( $F_{Cy3}$ ), excitation/emission was 530nm/563 nm.

**Table S1** Comparison of some aptamer-based detection methods for OTA

| Strategy                                              | LOD         | Detection range          | Analysis time | Ref.      |
|-------------------------------------------------------|-------------|--------------------------|---------------|-----------|
| A ratio-based FRET analysis method                    | 3.9 nmol/L  | 3.9-300 nmol/L           | 95 min        | [20]      |
| Aptamer-based molecular beacon                        | 3.9 nmol/L  | 3.9-500 nmol/L           | 15 min        | [22]      |
| Graphene oxide nanosheet based fluorescent aptasensor | 0.03 nmol/L | 0.1-74.1 nmol/L          | 85 min        | [23]      |
| Colorimetric aptasensor based on gold nanoparticle    | 5 nmol/L    | 6.3-750 nmol/L           | 70 min        | [38]      |
| Exonuclease-assisted recycling amplification          | 0.96 nmol/L | 5-200 nmol/L             | 40 min        | [39]      |
| Fluorescence anisotropy assay                         | 3 nmol/L    | 3 nmol/L-3 $\mu$ mol/L   | 40 min        | [40]      |
| Label-free aptasensor using SYBR gold and exonuclease | 16.5 nmol/L | 20-500 nmol/L            | 60 min        | [41]      |
| Ratiometric fluorescent aptasensor                    | 0.3 nmol/L  | 0.6 nmol/L-5 $\mu$ mol/L | 30 min        | this work |

References cited by above Table S1:

- [20] Y. Yuan, M. Song, Y. Cao, Q. Huang and F. Lu, *Microchem. J.*, 2023, **184**, 108163.
- [22] H. Yu and Q. Zhao, *Molecules*, 2022, **27**, 8267.
- [23] Q. Zhang, L. Z. Kang, P. F. Yue, L. C. Shi, M. Wang, L. D. Zhou, H. P. Zhao and W. J. Kong, *Food Chem. X*, 2022, **14**, 100308.
- [38] Y. He, F.Y. Tian, J. Zhou, Q.Y. Zhao, R.J. Fu and B.N. Jiao, *J. Hazard. Mater.*, 2020, **388**, 121758.
- [39] M. Liu, X.Y. Li, B.X. Li, J.X. Du and Z.Q. Yang, *Microchim. Acta*, 2020, **187**, 46.
- [40] Q. Zhao, Q. Lv and H.L. Wang, *Anal. Chem.*, 2014, **86**, 1238-1245.
- [41] L. Lv, D.H. Li, R.J. Liu, C.B. Cui and Z.J. Guo, *Sens. Actuator B-Chem.*, 2017, **246**, 647-652.
